# Supplementary material for: An electrochemical H2S sensor based on the screen printing Fe@Pt/C/PTFE sensing electrode
Source: Royal Society of Chemistry journal article supplement (doi:10.1039/d4ay00657g), 2024-01-01
Supplement: d4ay00657g1.pdf [file d4ay00657g1.pdf]

**An electrochemical H<sub>2</sub>S sensor based on screen printing Fe@Pt/C/PTFE  
sensing electrode**

*Dandan Liu, Xukun Deng, Chunhui Du, Lu Zheng, Yanting Guo, Yanmei Cheng,  
Guangming Nie\**

Key Laboratory of Optic-Electric Sensing and Analytical Chemistry for Life Science,  
MOE, State Key Laboratory Base of Eco-chemical Engineering, College of Chemistry  
and Molecular Engineering, Qingdao University of Science and Technology, Qingdao,  
266042, PR China

---

\*Corresponding author. Tel. +86-532-88959058, Fax. +86-532-88957187.

E-mail address: gmnie@126.com (G. Nie), liudandan0305@126.com (D. Liu)

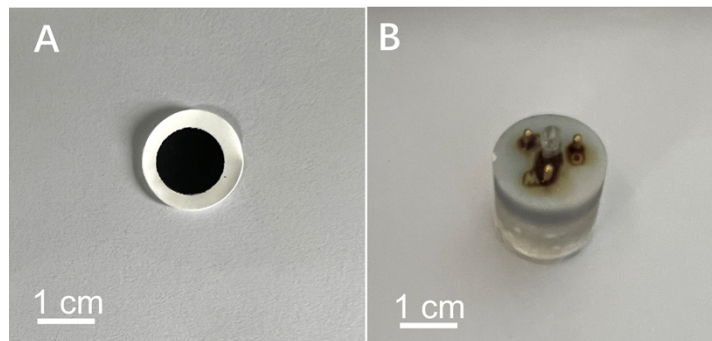

**Fig. S1.** (A) Optical photographs of the membrane electrodes (B) The optical photograph of the H<sub>2</sub>S gas sensor

**Table S1** Comparison of sensing performances of the present work and that of devices reported in literature.

| Material                                              | Temperature (°C) | Response/recovery times (s) | Low Detection Limit (ppm) | Reference |
|-------------------------------------------------------|------------------|-----------------------------|---------------------------|-----------|
| CuO/SnO <sub>2</sub>                                  | 200 °C           | 420/60                      | 5                         | [1]       |
| NiO-WO <sub>3</sub>                                   | 25 °C            | 270/7200 (10 ppm)           | 0.5                       | [2]       |
| Au/Cr                                                 | 90 °C            | 300/- (100 ppm)             | 10                        | [3]       |
| TiNT film                                             | 300 °C           | 22/6 (50 ppm)               | 1                         | [4]       |
| Ag- CaCu <sub>3</sub> Ti <sub>4</sub> O <sub>12</sub> | 250 °C           | 5/850 (10ppm)               | 0.2                       | [5]       |
| Fe@Pt                                                 | 25 °C            | 233/480 (20 ppm)            | 0.33                      | This work |

## References

1. J. Liu, X. Huang, G. Ye, W. Liu, Z. Jiao, W. Chao, Z. Zhou, Z. Yu, H<sub>2</sub>S detection sensing characteristic of CuO/SnO<sub>2</sub> sensor, *Sensors* 3 (5) (2003) 110–118.

2. Y. Wang, A. Maity, X. Sui, H. Pu, S. Mao, N. Singh, J. Chen, In operando impedance spectroscopic analysis on NiO-WO<sub>3</sub> nanorod heterojunction random networks for room-temperature H<sub>2</sub>S detection, *ACS Omega* 3 (12) (2018) 18685–18693.
3. M. Lucci, F. Toschi, V. Guglielmotti, S. Orlanducci, M.L. Terranova, Role of the material electrodes on resistive behaviour of carbon nanotube-based gas sensors for H<sub>2</sub>S detection, *J. Sens.* (2012) 359271.
4. X. Tong, W. Shen, X. Chen, J.-P. Corriou, A fast response and recovery H<sub>2</sub>S gas sensor based on free-standing TiO<sub>2</sub> nanotube array films prepared by one-step anodization method, *Ceram. Int.* 43 (2017) 14200–14209.
5. A. Natkaso, D. Phokharatkul, J.H. Hodak, A. Wisitsoraat, S.K. Hodak, Highly selective sub-10 ppm H<sub>2</sub>S gas sensors based on Ag-doped CaCu<sub>3</sub>Ti<sub>4</sub>O<sub>12</sub> films, *Sens. Actuators B Chem.* 260 (2018) 571–580.
